# Supplementary material for: PTSD Care Among Veterans With and Without Co-Occurring Substance Use Disorders
Source: Atypon-hosted journal article supplement (doi:10.1176/appi.ps.201600128), 2017-03-01
Supplement: appi.ps.201600128.ds001.pdf [file appi.ps.201600128.ds001.pdf]

## ICD-9 codes for substance use diagnoses

| Substance                      | ICD-9-CM Codes                                                                                                                                                                                                                  |
|--------------------------------|---------------------------------------------------------------------------------------------------------------------------------------------------------------------------------------------------------------------------------|
| Alcohol                        | 291.0, 291.1, 291.2, 291.20, 291.21, 291.3, 291.4, 291.5, 291.8, 291.81, 291.89, 291.9, 303.00, 303.01, 303.02, 303.90, 303.91, 303.92, 305.00, 305.01, 305.02                                                                  |
| Drugs                          | 292.0, 292.11, 292.12, 292.2, 292.81, 292.82, 292.83, 292.84, 292.89, 292.9, 304.60, 304.609, 304.61, 304.62, 304.80, 304.81, 304.82, 304.90, 304.900, 304.91, 304.92, 304.99, 305.90, 305.909, 305.91, 305.92, 305.929, 305.99 |
| Amphetamine                    | 304.40, 304.41, 304.42, 305.70, 305.71, 305.72                                                                                                                                                                                  |
| Antidepressant                 | 305.80, 305.81, 305.82                                                                                                                                                                                                          |
| Cannabis                       | 304.30, 304.31, 304.32, 305.20, 305.21, 305.22                                                                                                                                                                                  |
| Cocaine                        | 304.20, 304.21, 304.22, 305.60, 305.61, 305.62                                                                                                                                                                                  |
| Hallucinogen                   | 304.50, 304.51, 304.52, 305.30, 305.31, 305.32                                                                                                                                                                                  |
| Opioid                         | 304.00, 304.000, 304.001, 304.003, 304.011, 304.01, 304.02, 304.020, 304.09, 304.70, 304.71, 304.72, 305.50, 305.51, 305.52                                                                                                     |
| Sedative, Hypnotic, Anxiolytic | 304.10, 304.11, 304.12, 305.40, 305.41, 305.42                                                                                                                                                                                  |

Outpatient stop codes and Inpatient bed section codes

---

| Outpatient stop codes               |                                                                                                                                                                                                                                                      |
|-------------------------------------|------------------------------------------------------------------------------------------------------------------------------------------------------------------------------------------------------------------------------------------------------|
| Mental health clinic                | 501, 502, 503, 504, 505, 506, 509, 510, 511, 512, 515, 520, 521, 524, 529, 531, 532, 533, 535, 541, 550, 551, 552, 553, 554, 557, 558, 559, 563, 564, 565, 566, 573, 574, 575, 576, 577, 578, 580, 581, 582, 583, 584, 585, 586, 587, 588, 589, 590, |
| PTSD specialty clinic               | 516, 525, 540, 561, 562                                                                                                                                                                                                                              |
| Substance use specialty clinic      | 513, 514, 523, 545, 547, 548, 560                                                                                                                                                                                                                    |
| PTSD-substance use specialty clinic | 519                                                                                                                                                                                                                                                  |
| Inpatient bed section codes         | 26, 79, 88, 91, 110                                                                                                                                                                                                                                  |

---

Current Procedural Terminology codes used for psychotherapy identification

90791, 90792, 90801, 90806-90809, 90821, 90822, 90834, 90836-90838, 90847, or 90853
